# Supplementary material for: Extracellular matrix remodeling through endocytosis and resurfacing of Tenascin-R
Source: Nat Commun. 2021 Dec 8;12:7129. doi: 10.1038/s41467-021-27462-7 (PMC8654841; doi:10.1038/s41467-021-27462-7)
Supplement: Supplementary file 6 — Source Data [file 41467_2021_27462_MOESM6_ESM.xlsx]

## Sheet: Figure 1
Figure 1c
TNR
Surface	Endocytosed	Non-recycled
1	0.738471	0.495132
1	0.315639	0.0320399
1	0.239232	0.0977595
1	0.717911	0.361076
Syt1
Surface	Endocytosed	Non-recycled
0.577239	0.363636	0.169228
0.577239	0.450512	0.066643
0.577239	0.374179	0.136737
Calmodulin
Surface	Endocytosed	Non-recycled
0.010345	0.009952	0.008516
0.010345	0.010462	0.011399
0.010345	0.010332	0.010802
Figure 1e
LAMP1
Surface	Endocytosed	Non-recycled
1	0.640505	0.723239
1	0.763617	0.920534
1	0.721835	0.741162
MBP
Surface	Endocytosed	Non-recycled
1	0.022334	0.041293
1	0.008259	0.021503
1	0.023216	0.030689

## Sheet: Figure 2
Figure 2c
2h	4h	12h	No blocking
0.223079	0.24609	0.365444	1
0.200125	0.222819	0.284697	1
0.233444	0.274376	0.385209	1
Figure 2e
12h
88.5997
47.9199
80.9268
Figure 2f
Ctrl	CNQX+AP5	Bic
1	0.579914	1.19705
1	0.698665	1.29932
1	0.582538	1.12965
Figure 2g
Dendrites						Axons
Distance from synapse	All epitopes - mean	All epitopes - SEM	New epitopes - mean	New epitopes - SEM		Distance from synapse	All epitopes - mean	All epitopes - SEM	New epitopes - mean	New epitopes - SEM
0	35.1899	5.6395	100	0		0	42.6516	7.803	100	5.8016e-15
0.02	35.0407	5.7575	99.4684	1.3485		0.02	42.5324	7.9533	100.381	1.1632
0.04	35.029	5.8011	98.4015	0.9237		0.04	42.2079	8.1306	100.232	1.5564
0.06	34.2317	5.9041	94.8472	1.7886		0.06	41.8901	8.4292	97.1935	1.9699
0.08	33.4092	5.5038	91.1247	2.7717		0.08	41.3711	8.767	95.5224	2.1813
0.1	32.858	6.0719	87.6847	3.4954		0.1	40.4771	8.8068	92.3033	2.6348
0.12	32.0926	6.1541	83.392	3.5166		0.12	39.5359	9.1385	89.5967	3.9739
0.14	30.8089	6.2233	78.8969	4.9731		0.14	38.704	9.139	85.3561	5.1994
0.16	29.8603	6.4422	75.5173	5.135		0.16	37.45	9.1206	81.4362	6.5143
0.18	29.4249	6.8895	71.2696	5.3787		0.18	36.2131	8.596	78.3916	7.391
0.2	28.5084	7.1248	67.6029	6.1542		0.2	34.8235	8.4028	74.4064	9.7309
0.22	27.6433	7.3426	63.354	6.885		0.22	33.5187	8.1434	70.4652	11.2516
0.24	26.6621	7.3469	59.7911	7.4061		0.24	32.5021	7.9607	66.9492	11.8756
0.26	27.0598	8.1076	55.6061	7.4383		0.26	31.6929	7.2347	64.3678	12.6512
0.28	26.5522	8.5426	52.2207	7.603		0.28	30.6503	7.0018	61.3083	13.6178
0.3	26.5924	9.0442	49.6805	8.5174		0.3	30.2274	7.1785	58.072	14.0718
0.32	26.0307	9.1492	47.1251	8.5201		0.32	29.6438	7.1717	55.4784	14.364
0.34	25.4279	9.0186	45.7381	8.8348		0.34	29.0517	7.3298	54.6289	14.9675
0.36	25.5702	9.3684	44.5499	9.5712		0.36	28.7333	7.5509	52.2152	14.9461
0.38	25.6544	9.7322	44.0499	10.0905		0.38	29.1451	7.896	52.1543	16.0231
0.4	25.796	10.013	42.6203	9.7186		0.4	28.5752	8.0526	50.6315	16.42
0.42	26.198	10.4259	42.1177	10.2831		0.42	28.4452	8.4088	48.6943	16.7243
0.44	26.1483	10.362	41.2415	10.6577		0.44	28.8053	8.748	48.1422	16.537
0.46	25.9925	10.4822	40.163	10.8982		0.46	28.5645	9.1466	47.6337	16.5506
0.48	25.8088	10.4279	38.1695	10.3495		0.48	28.82	9.2989	46.914	16.3524
0.5	25.8416	10.3992	36.3526	10.4627		0.5	28.8364	9.8689	45.5472	16.2317
0.52	25.312	10.0681	35.1073	10.4709		0.52	28.9322	10.1112	43.8919	15.4718
0.54	25.0087	10.2716	34.1012	10.058		0.54	28.1695	10.0407	42.0334	15.5952
0.56	24.8744	9.9516	33.0957	10.176		0.56	27.9907	10.2285	42.5539	15.3376
0.58	24.9703	10.0042	32.994	10.0789		0.58	28.1348	10.1941	42.1422	14.6484
0.6	25.5766	10.2366	32.9335	10.3499		0.6	27.1724	10.0676	40.4608	14.4392
0.62	25.1371	10.1376	31.983	10.1401		0.62	27.1292	10.2146	40.956	14.3983
0.64	24.7547	9.9758	31.2378	9.9444		0.64	27.2993	10.3871	39.7324	14.1486
0.66	26.0099	10.3242	31.3226	10.0145		0.66	27.2864	10.3666	38.7553	14.6511
0.68	25.4541	10.0117	30.9654	10.1463		0.68	27.1453	10.4862	38.9568	14.9594
0.7	24.698	9.5191	30.3329	9.9694		0.7	27.0742	10.4841	37.4022	15.1384
0.72	23.7767	9.2925	29.6128	9.6832		0.72	27.2849	10.9462	37.4192	15.0347
0.74	23.7973	9.1363	29.6786	10.1118		0.74	26.49	10.5105	36.855	14.8491
0.76	22.2329	8.5843	29.0719	9.842		0.76	25.4555	10.4647	34.7983	14.2722
0.78	21.5121	7.9709	29.8146	10.2045		0.78	24.9559	10.3119	34.5493	14.2323
0.8	20.8948	7.4905	30.0286	10.4544		0.8	24.073	10.1777	34.7725	14.7511
0.82	20.8511	7.1538	29.8467	10.3029		0.82	23.1752	9.6653	34.1659	14.3096
0.84	20.4868	7.1442	29.565	10.373		0.84	23.3425	9.745	33.5138	13.9507
0.86	20.4884	6.6866	29.9808	10.8101		0.86	22.3204	9.6956	33.4129	14.1994
0.88	20.7451	6.643	30.4233	11.3367		0.88	21.4299	9.1206	34.0592	14.3136
0.9	20.4338	6.4331	30.6181	11.5871		0.9	20.1096	8.6845	33.0593	13.8724
0.92	20.337	6.4981	31.1635	11.8646		0.92	20.0447	9.0147	32.7222	13.8458
0.94	19.9589	6.2449	31.1454	11.9338		0.94	19.2291	8.5103	32.3699	13.6145
0.96	19.9441	6.53	30.7035	12.0041		0.96	18.895	8.8872	31.8685	13.5128
0.98	19.8488	6.6095	29.5199	11.5509		0.98	18.6281	8.4059	31.8648	13.0783
1	19.8642	6.4531	28.8034	11.3578		1	18.0143	8.159	30.3705	12.4375
1.02	19.843	6.7098	27.3791	11.2419		1.02	18.0784	8.3668	30.7224	13.6776
1.04	19.4222	6.2755	25.9894	10.505		1.04	18.0743	8.5875	30.8083	13.7117
1.06	19.4452	6.4336	25.5234	10.3586		1.06	17.9611	8.2897	30.2751	13.9346
1.08	19.666	6.5771	25.2295	10.5558		1.08	17.4697	7.5653	30.5343	14.6446
1.1	19.5556	6.5846	23.6692	9.9101		1.1	18.041	8.1674	30.2478	14.6388
1.12	19.7878	6.6897	23.2498	10.0278		1.12	17.1533	7.9549	29.6408	14.0547
1.14	19.9864	6.8979	23.5979	9.9043		1.14	17.4422	7.6275	29.9215	14.3278
1.16	19.4077	6.975	21.8466	9.3245		1.16	16.8537	7.4606	29.5399	13.9158
1.18	19.4479	6.8968	21.9982	9.4059		1.18	16.6308	7.1994	29.3517	13.5913
1.2	19.5132	7.2328	21.1432	8.8163		1.2	15.9127	6.8766	29.0425	13.6756
1.22	18.9952	7.0499	20.8796	8.7133		1.22	15.6952	6.6435	28.2521	13.1901
1.24	18.9531	7.4118	20.0838	8.2834		1.24	15.5457	6.43	28.2894	12.9618
1.26	18.0962	6.9591	19.4807	8.1104		1.26	15.0155	6.3709	28.297	12.8383
1.28	18.2513	7.0884	19.7008	7.7257		1.28	14.4262	6.0169	28.6813	13.0476
1.3	17.2431	6.9418	18.6843	7.3354		1.3	14.3746	5.8493	28.5858	12.5537
1.32	16.5852	6.6097	17.3351	6.2304		1.32	13.6735	5.7136	28.5657	13.0102
1.34	16.0131	6.4543	17.967	6.7098		1.34	13.4513	5.6678	28.858	12.9644
1.36	15.5931	5.947	18.0807	6.4026		1.36	13.2888	5.5225	27.9727	12.742
1.38	14.2007	5.2761	16.899	6.3211		1.38	12.6564	5.7372	28.6902	13.32
1.4	13.9831	4.8036	17.4228	6.2177		1.4	12.5353	5.546	28.2937	12.9407
1.42	13.364	4.4499	17.1995	6.4513		1.42	12.4968	5.422	27.4789	12.7734
1.44	12.5971	4.2583	17.4824	6.1156		1.44	12.3775	5.3007	26.5851	12.3458
1.46	12.3438	4.0441	17.4973	5.6859		1.46	12.2795	5.1918	25.5176	11.6482
1.48	12.7037	4.5946	16.2444	5.4948		1.48	12.3581	5.147	24.5394	11.11
1.5	12.5146	4.3889	16.2043	5.5248		1.5	12.3229	5.0778	23.9837	10.3135
1.52	12.562	4.6546	15.6118	5.3198		1.52	11.531	4.3611	23.0419	10.2451
1.54	11.8162	4.1268	14.9867	5.0571		1.54	11.4091	4.2541	22.0029	9.0907
1.56	11.1025	4.139	13.637	4.756		1.56	11.0944	4.3765	21.4866	9.2978
1.58	11.1287	4.0761	13.3751	4.8339		1.58	11.0589	4.3003	21.8145	8.676
1.6	10.3861	3.6204	12.946	4.5427		1.6	10.6996	4.0841	21.8751	8.8848
1.62	9.8084	3.2996	12.1385	3.9456		1.62	10.8625	3.9434	20.8248	8.7646
1.64	9.3248	3.2028	11.448	3.6016		1.64	10.5295	3.8739	21.093	8.8807
1.66	8.1504	2.6567	12.0342	4.3551		1.66	10.0712	3.866	21.1794	9.3719
1.68	7.5407	2.3097	12.206	4.9306		1.68	9.6285	3.6855	20.5553	9.1729
1.7	6.2044	2.1654	11.0161	4.5248		1.7	9.2053	3.198	20.013	9.5818
1.72	5.7806	1.7312	11.1753	4.7972		1.72	8.678	3.0261	19.7072	10.0298
1.74	5.5388	1.3507	10.6317	4.5641		1.74	8.8623	3.1959	20.3123	10.0856
1.76	5.7897	1.1971	10.9651	4.7267		1.76	8.9215	3.1761	20.0185	10.5335
1.78	4.861	0.9212	10.6511	4.4372		1.78	8.3009	3.2832	19.4453	10.6358
1.8	5.2329	1.1576	10.5096	3.9845		1.8	8.3558	2.9557	20.0728	10.2603
1.82	5.1662	1.0598	11.0546	3.5176		1.82	8.0961	2.9313	19.523	10.5042
1.84	5.1378	1.0662	11.2399	4.1655		1.84	7.7368	2.6183	19.9816	10.7589
1.86	4.5948	0.8161	10.8642	3.8358		1.86	7.4551	2.838	19.9909	10.5387
1.88	4.5926	1.0337	10.7704	3.7496		1.88	7.4434	2.6764	19.8104	9.904
1.9	5.09	1.0237	10.6204	3.7903		1.9	7.1214	2.4223	19.4183	9.4707
1.92	5.2052	1.3159	9.9422	3.1753		1.92	6.4731	2.1206	18.8067	8.5905
1.94	4.9451	1.1048	10.3158	3.3296		1.94	6.0454	1.9186	18.4671	7.9715
1.96	5.6296	1.9817	9.5284	3.0671		1.96	5.9041	1.4908	17.0356	7.4504
1.98	5.7248	2.1029	8.5416	2.9673		1.98	6.0474	1.4635	15.6943	6.8918
2	5.4219	1.844	8.8921	2.7373		2	5.8635	1.2526	15.8352	6.4795
2.02	5.698	2.3553	8.5071	3.0111		2.02	5.4585	1.1124	15.2645	7.1049
2.04	5.5504	2.7383	8.6465	3.3312		2.04	5.6858	1.2197	14.8039	6.8885
2.06	5.6161	3.351	8.9326	3.6247		2.06	5.6736	1.6304	15.0192	6.9619
2.08	5.0136	3.5095	8.6682	3.6335		2.08	5.3775	1.6348	14.5315	7.1153
2.1	4.9382	3.8145	9.1696	4.1561		2.1	5.8432	1.879	14.0058	7.0467
2.12	4.7976	3.9601	8.7586	4.2064		2.12	5.7788	1.8909	14.8593	7.5077
2.14	5.3999	4.4	9.1767	4.4614		2.14	5.9437	1.8427	14.2903	7.0947
2.16	5.5924	4.5913	9.1183	4.5224		2.16	4.8942	1.4842	13.8424	7.081
2.18	5.6549	5.1411	8.4401	4.9641		2.18	4.5735	1.6774	12.6826	6.6889
2.2	5.715	5.4367	7.9733	4.9409		2.2	3.9661	1.1972	12.4216	6.3998
2.22	5.9472	5.5542	7.7773	4.738		2.22	3.6091	1.2169	12.5704	6.016
2.24	5.7818	5.594	7.9283	4.8219		2.24	3.5748	0.9512	12.6392	5.851
2.26	5.882	6.1003	7.3742	5.2141		2.26	3.2548	0.9561	13.7539	6.2385
2.28	5.7728	6.1348	8.1397	5.1257		2.28	3.0918	0.8949	13.758	6.2203
2.3	5.9741	6.095	7.9004	4.2856		2.3	3.1983	0.8328	13.3279	5.6895
2.32	6.3115	5.8629	7.5106	4.2601		2.32	3.1954	1.0565	13.1755	5.34
2.34	6.2424	5.7658	8.0189	4.0537		2.34	3.317	0.9089	11.8701	4.9269
2.36	5.2411	4.8497	7.0329	3.4536		2.36	3.3502	0.8081	9.2825	3.7053
2.38	5.6427	4.69	6.1632	3.3721		2.38	3.215	0.7195	9.3471	3.9497
2.4	4.9673	4.2554	6.4631	2.7764		2.4	3.0368	0.7008	8.4842	3.6731
2.42	5.1256	4.1401	5.3319	2.5536		2.42	2.7338	0.6577	6.861	3.6749
2.44	4.9952	3.6159	5.8023	2.3646		2.44	2.695	0.6154	6.9928	3.3656
2.46	5.2057	3.8067	5.0126	1.924		2.46	3.1011	0.8346	6.9929	3.3105
2.48	5.7479	3.8854	5.4508	2.3179		2.48	3.2918	0.6947	6.6277	3.3688
2.5	5.6156	3.1849	5.0572	1.5753		2.5	2.7509	0.6496	6.7221	3.2357
2.52	4.7753	3.0997	4.7991	0.7634		2.52	2.3704	0.5179	6.8055	3.1406
2.54	5.0692	3.3049	5.05	1.2137		2.54	1.9267	0.28	5.4773	2.3533
2.56	5.3361	3.2834	4.8016	1.4375		2.56	2.2351	0.2879	5.5892	2.0752
2.58	5.4368	3.1355	4.9531	1.2414		2.58	2.6027	0.6107	6.0929	2.3242
2.6	4.8735	2.9695	4.0387	1.0878		2.6	2.3576	0.853	4.7176	1.5863
2.62	4.9244	3.0461	3.6707	1.2228		2.62	2.3482	1.0877	4.3465	2.1279
2.64	4.4504	2.9165	3.4453	1.4255		2.64	1.9533	1.1326	4.6961	2.06
2.66	4.5076	3.1149	3.4425	1.1871		2.66	1.7191	1.2988	3.7817	1.675
2.68	4.0341	2.9647	3.2401	1.1645		2.68	1.6662	1.3437	3.2806	1.6658
2.7	4.2867	3.0601	2.8907	1.6069		2.7	1.0526	0.6373	2.6473	1.4366
2.72	3.6811	2.9679	2.1571	1.4042		2.72	1.3266	0.8158	2.9046	1.4863
2.74	3.5025	3.0224	1.7364	1.3834		2.74	1.5598	0.8563	2.8461	1.4762
2.76	3.1984	2.619	2.2093	1.8412		2.76	1.36	0.9947	3.5424	1.3902
2.78	2.8024	2.3236	2.0015	1.6109		2.78	1.3046	0.8211	3.9367	1.5804
2.8	2.1785	2.023	2.7788	1.7479		2.8	1.0353	0.8212	4.7195	2.1247
2.82	1.7053	1.7755	3.2714	1.9438		2.82	0.4048	0.4081	4.7114	1.7089
2.84	1.0004	1.5372	2.8827	1.6726		2.84	0.2899	0.3107	3.3964	1.2889
2.86	0.6432	1.1233	3.0468	1.8001		2.86	0.2027	0.2753	3.9204	1.614
2.88	0.4031	0.8182	2.7763	1.6722		2.88	-0.2909	0.1677	3.4162	1.3276
2.9	0.091	0.9135	1.849	1.4913		2.9	-0.6291	0.4959	2.0494	0.9637
2.92	0.074	0.9581	1.8513	1.1877		2.92	-0.4511	0.5396	1.7582	0.9601
2.94	-0.1951	0.4604	1.675	1.1744		2.94	-0.6189	0.3156	0.7116	0.5504
2.96	0.1447	0.2728	0.6016	1.1354		2.96	-0.5416	0.4136	0.9521	0.5341
2.98	0.103	0.3717	0.5884	0.8539		2.98	0.0275	0.1316	0.7514	0.333
3	0	0	0	0		3	0	0	0	0

## Sheet: Figure 3
Figure 3a
TNR mean	Syt1 mean in bin
0.83478	0.6
1.0107	0.8
1.10525	1
1.19268	1.3
1.22844	2
0.900266	0.6
1.07207	0.8
1.08156	1
1.05736	1.3
1.21833	2
0.879982	0.6
0.933942	0.8
1.04968	1
1.21072	1.3
1.34816	2
Figure 3b
TNR mean	mean head size in bin (micron sq)
0.055868	0.545
0.210099	1.37372
0.284369	1.9348
0.396668	2.662
0.554078	3.93652
0.14471	0.545
0.37504	1.37372
0.573002	1.9348
0.641086	2.662
0.94654	3.93652
0.133917	0.545
0.402381	1.37372
0.338084	1.9348
0.588717	2.662
0.648806	3.93652

## Sheet: Figure 4
Figure 4a
0	2h	4h	6h	8h	10h	12h
1	1.61241	3.30508	6.41769	8.49498	9.95744	9.66085
1	1.25875	3.92774	8.70539	14.5448	18.6114	20.2072
1	5.30229	5.67775	7.54534	8.29738	7.17451	7.6887
1	1.52884	4.596	7.62317	6.83066	6.59386	6.6002
1	1.62586	2.17848	2.45815	2.70336	3.00194	2.93303
Figure 4b
axon	dendrites
2.3245	2.52033
3.02893	3.0353
3.10918	2.78364
3.70013	3.47684
Figure 4c
Day	Ratio Exp1	Ratio Exp2	Ratio Exp3	Ratio Exp4
0	1	1	1	1
1	0.4122	0.6978	1.0161	0.8249
2	0.5442	0.6812	0.8296	0.6137
3	0.942	0.9941	1.1329	0.8035
4	0.4892	0.7493	0.7686	0.5866
5	0.4764	0.6724	0.9355	0.7277
6	0.6422	1.3227	0.9967	0.9484
7	0.4766	0.375	1.0294	0.3926

## Sheet: Figure 5
Figure 5b
0h	24h	72h
0.877624	2.40299	5.32451
0.401694	2.53516	3.34192
0.517709	1.03349	4.3981
Figure 5e
Ratio day 0	Ratio day1	Ratio day3
1	0.4463	0.8908
1	0.3974	0.9591
1	0.4792	1.262

## Sheet: Figure 6
Figure 6a
% in acidified organelles
74.09
68.75
71.56
Figure 6g
neg ctrl	caveolin1	rab5	rab7	rab11a	rab11b	lamp1	tgn38	calreticulin
1.1018	7.724	3.2928	2.5388	7.0936	1.8435	9.778	14.114	11.825
1.0926	10.126	4.7912	4.0201	4.316	6.7072	5.8554	9.062	8.9248
0.8263	5.9953	4.9184	5.671	6.6693	2.7022	5.6457	5.0579	6.6233

## Sheet: Figure 7
Figure 7a
Surface			Internalized
Surface b1-integrin	Neg ctrl		Internalized b1-integrin	Neg ctrl
17.506	1.1018		10.9384	0.9513
23.2861	1.0926		17.2998	0.4756
20.4548	0.8263		38.4421	0
			33.8148
Figure 7d
Ctrl	b1-integrin block
8.82172	3.47685
6.215	5.54389
8.42645	4.32587

## Sheet: Figure 8
% TNR colocalizing
Gal	Glc+Gal	Glc	AHA
10.4203	24.6744	7.79893	0
26.3372	17.6206	13.9197	8.62422
22.545	24.595	1.58157	11.7856
26.8355	14.3066	15.5638	1.93045

## Sheet: Figure 9
Figure 9c
Size (nm)	No. aggregate spots
0	0
20	0
40	2
60	11
80	55
100	130
120	135
140	115
160	92
180	68
200	70
220	48
240	40
260	38
280	27
300	21
320	22
340	11
360	22
380	8
400	6
420	13
440	4
460	3
480	4
500	5
520	4
540	5
560	3
580	3
600	3
620	3
640	2
660	3
680	1
700	4
720	2
740	1
760	1
780	0
800	0
820	3
840	2
860	0
880	0
900	1
920	0
940	1
960	1
980	0
1000	2
Figure 9e
New epitopes
	No Aggregates					With Aggregates
Ctrl	1	1	1	1		1.31347	1.19631	1.65001	1.18612
Stim	2.08718	1.34306	2.03366	2.16625		0.984324	0.840028	1.64022	1.62031
All other epitopes
	No Aggregates				With Aggregates
Ctrl	1	1	1		1.27069	1.29117	0.798037
Stim	2.50404	2.38093	2.04828		3.11637	2.78863	2.00926
Figure 9f
Head size (micron sq)
-Aggregates	Aggregates - New epitopes	Aggregates - All epitopes
0.33768	0.302143	0.34944
0.36518	0.293082	0.344463
0.448457	0.2524	0.398571
Figure 9g
Head size (micron sq)
-Aggregates	Aggregates - New epitopes	Aggregates - All epitopes
0.543436	0.214766	0.521888
0.786831	0.251255	0.455294
0.71964	0.264	0.4506

## Sheet: Figure 10
Figure 10a
Vehicle			KA
Extracellular TNR	Intracellular TNR		Extracellular TNR	Intracellular TNR
1.00148	0.947758		1.31802	1.17249
0.800865	0.71506		1.07751	0.253861
0.600274	0.529852		0.806914	0
0.873071	0.63849		0.892826	0.0841585
0.878354	1.24883		1.09627	1.21989
1.37599	1.45909		1.53962	2.2588
1.41787	2.04807		1.71427	2.40528
1.52736	1.63398		1.74758	2.50872
1.50064	0.929534		1.81144	3.3683
1.17529	1.84302		2.01068	3.0186
0.392569	1.68146		0.776363	1.76323
0.755535	0.829456		1.08349	1.28222
0.964649	1.32471		1.3828	2.72917
1.5021	1.51461		1.33157	1.78283
1.34199	1.33834		1.44168	1.91959
1.25554	2.24226		1.11618	1.43965
1.18755	1.80872		2.48985	2.50918
1.30745	1.70994		1.20026	1.25503
0.889227	1.7349		0.555909	2.19325
0.450992	1.41545		0.906685	1.35304
1.76412	0.549783		0.889687	1.30128
0.32024	0.635733		1.14199	1.21882
0.715566	0.550756		0.90523	1.17242
0.607356	0.87471		0.860513	1.11591
0.384284	0.591705		2.00095	2.24019
0.282108	0.444208		1.71557	1.99187
0.462876	0.460402		1.72185	1.9555
0.407592	0.952275		0.550932	0.946686
0.781033	0.724478		1.78334	2.59946
0.547103	0.484201		1.17974	1.65802
1.53609	0.391558		0.97177	1.30258
0.806838	3.36118		1.56894	2.67342
0.870468	1.22793		0.702089	1.84417
1.00738	1.58873		0.552945	2.37304
1.21304	1.90565		0.360156	1.57916
0.70431	1.08742		0.170783	0.309811
1.07713	1.09117		0.218195	0.0639056
0.756301	0.820574		0.433901	0.76039
0.581269	0.744157		0.686699	0.978233
0.970622	0.771722		0.257009	1.50305
0.869013	0.991939		1.07813	1.11774
0.815107	1.02119		1.20439	1.60756
1.60378	1.19041		0.824985	1.26951
1.57859	1.91438		0.825444	1.02081
0.510533	0.718123		0.662809	1.46392
0.838921	1.05166		0.317614	1.36346
0.533542	0.630144		0.50711	0.671875
0.294551	0.44482		0.646576	1.078
1.5325	0.927926		3.45326	1.02716
1.22422	1.23911		1.00653	0.760467
1.27514	1.64294		0.928355	1.83888
1.60554	1.59945		0.566598	1.47816
1.6106	1.3934		0.679731	0.684662
1.55286	1.18336		0.418564	1.07463
1.30983	1.09431		0.511873	1.08114
0.976977	1.20787		1.04244	0.979075
1.36473	1.2058		0.859595	2.09631
1.3707	1.12196		1.85853	1.40159
1.10883	1.70764		2.06642	3.31103
1.0295	1.0179		1.29206	2.55665
			1.53724	1.88383
			1.2818	1.76859
			1.49735	1.66384
			1.50861	1.79325
			1.43579	3.19142
			1.07414	2.40995
				2.79165
Figure 10b
WT			5xFAD
Extracellular TNR	Intracellular TNR		Extracellular TNR	Intracellular TNR
0.962467	0.894668		0.383232	0.76997
1.20578	1.47013		0.486543	0.971525
1.33297	1.11208		0.372343	0.847865
1.02007	1.18459		0.444916	1.10472
1.18945	1.18521		0.233043	0.584315
1.63828	1.33321		0.299648	0.648103
1.63153	1.12439		0.218667	0.592383
1.40799	1.29254		0.519442	0.876268
1.66088	1.20474		0.593185	1.32514
1.06716	0.960721		0.462401	0.684102
1.04928	0.630835		1.27169	1.0992
1.09396	0.896225		1.68782	1.0405
1.30028	0.572992		1.2456	1.17034
1.43215	1.19492		1.5158	1.58237
0.799977	0.227631		1.47909	1.51783
1.0088	0.706654		1.76722	1.39964
1.2079	0.563414		2.07621	1.42276
1.13321	0.505807		2.07338	1.47131
1.04305	0.41682		2.22166	1.78317
0.403166	0.928497		1.59388	1.10212
0.447096	0.976102		1.4171	0.613237
0.503024	0.927034		1.96675	1.08372
0.491195	0.83942		1.81483	1.25758
0.636261	0.756807		1.50051	0.917456
0.525104	0.64164		2.04474	0.908917
0.791485	1.60431		1.98128	1.04088
0.784313	1.3334		1.26796	0.857632
0.673911	0.968175		1.4221	1.03498
0.559263	0.795401		1.43248	1.23083
			1.06334	0.825313
			0.954304	0.332924
			0.615219	0.858811
			1.42795	0.917126
			1.8756	1.0112
			0.975064	1.03376
			0.945812	0.760676
			1.24597	0.790399
			1.53061	0.649991
			1.43083	0.58172
			1.06301	0.982848
			0.69184	0.63159
			0.55294	1.89447
			0.491011	1.04187
			0.543268	1.47395
			0.578937	1.50768
			0.641262	2.06974
			0.605264	1.49938
			0.741756	0.75492
			0.859377	1.42856
			0.335533	0.982141
			0.39791	1.55751
			0.595592	1.42007
			0.677497	0.952276
			0.513875	1.31788
			1.08216	1.22068
			0.982329	1.48074
			0.875796	1.36105
			1.62625	1.63738
			1.32845	0.131572
			1.54397	0.142442
			1.74557	0.432857
			1.38969	0.142499
			1.43149	0.0579659
			1.2799	0
			1.44842	0.0476805
			1.41295	0.0113894
			1.52354	0.0856136
				0.124561
Figure 10e
14 days feeding				21 days feeding
nucleus	ER	TNR		nucleus	ER	TNR
0.4857	0.517	0.2748		1.6105	0.9694	0.6942
0.5662	0.581	0.3141		1.782	0.9948	0.4292
0.5178	0.4128	0.3048		1.8323	0.3841	0.7206
0.6344	0.362	-0.1619		1.5618	1.6244	0.6323
0.6451	0.2348	0.4092		1.692	1.2371	1.123
0.6836	-0.0282	0.4407		1.8801	0.8609	0.7786
0.6991	0.2192	0.045		1.7622	0.9466	1.0819
0.6905	0.1916	0.2669		2.0979	0.8393	1.0048
0.7075	0.9189	0.3046		1.7819	2.053	0.9991
0.639	0.1739	0.3574		1.9406	2.0419	0.8708
0.5984	0.4412	0.4184		1.8077	2.0544	1.187
0.7799	0.1981	0.2572		1.5319	1.598	0.8097
0.0382	0.6616	0.3241		1.6455	1.9512	1.2853
0.1377	0.5275	0.4786		2.0613	1.8689	1.0561
0.152	0.5506	0.1762		2.0029	1.9834	1.1438
0.637	0.5242	0.3721		2.0987	1.3652	1.0324
0.6074	0.7133	0.2932		1.9962	0.787	0.9211
0.6084	0.6826	0.4933		1.6878	0.9597	0.8683
0.7553	0.9714	0.4273		1.5383	1.0907	1.3003
1.3802	0.7425	0.3818		1.5986	0.7055	1.033
2.191	0.7475	0.3262		1.8053	0.9551	0.8473
2.3191	0.9332	0.1901		1.6272	0.8857	0.7455
1.026	0.6659	0.1337		1.611	0.7756	0.5338
0.9688	0.6615	0.1784		1.7151	1.5467	0.8622
0.7801	0.8192	0.2548		1.8741	1.6526	0.8172
0.9813	0.9331	0.3477		1.8458	1.7178	1.1416
0.8585	0.7495	0.3933		0.9779	0.7831	0.8879
1.1334	1.0122	0.5708		0.9939	1.0298	0.9729
2.0307	0.8446	0.4683		1.3462	0.9904	0.9013
2.4407	0.8664	0.3311		1.3508	1.3287	1.4135
0.8401	0.8699	0.4293		1.0417	1.5501	1.0612
0.9244	1.0745	0.437		1.5595	1.4078	1.0314
1.0166	0.7897	0.4646		2.292	1.4322	0.9435
1.1227	0.6933	0.4827		1.8939	1.471	1.2568
1.0662	0.6039	0.6056		1.643	1.0545	0.2555
1.7302	0.8586	0.354		2.156	1.0849	1.2026
1.2296	0.8745	0.5136		2.1247	1.0335	1.3293
1.6466	0.9619	0.5581		2.0796	1.0734	1.4597
0.7618	0.9638	0.3472		2.3157	1.619	0.8313
0.3879	0.9615	0.4676		2.1161	1.6095	1.0518
0.6744	0.9394	0.6915		2.0127	1.4906	0.8996
0.6787	0.8313	0.6112		1.8768	1.8809	0.9324
0.8661	0.4966	0.6191		1.7705	1.4102	0.9965
0.7855	0.8074	0.7092		2.0506	2.0269	0.9762
1.283	0.5521	0.7127		2.0849	1.7792	0.7541
1.331	0.6839	0.9525		1.7464	1.7878	1.0464
1.3794	0.3021	1.0142		1.9169	1.9294	1.0325
1.2795	0.736	0.7611		2.2538	1.5254	0.7174
1.1824	0.7668	0.7452		2.2044	2.0134	0.5927
1.1914	0.4296	0.4484		2.4048	2.0319	0.909
1.5096	0.9721	0.8006		2.423	1.7724	0.6159
1.6566	0.9767	0.8364		2.4069	1.9134	0.5195
1.4006	0.9433	0.8608		2.5389	1.7856	0.6302
1.5362	0.9683	1.0945		2.5695	0.8257	0.7284
1.7175	1.3844	0.6293		2.4843	1.5197	0.6187
1.6052	0.4452	0.3695		2.535	0.9489	1.2113
1.8826	0.4869	0.4721		2.1637	1.566	0.7826
1.4073	0.596	0.1103		2.3723	1.4063	0.796
1.2098	0.6616	0.1299		2.2628	1.3454	0.7314
1.5548	0.7282	0.416		1.2202	1.5718	1.1354
0.9959	0.5477	0.2748		1.3415	1.1997	1.1059
0.6227	0.4018	0.3141		1.9581	1.2619	1.3408
0.8409	0.7557	0.3048		1.6701	1.6488	1.1337
0.8122	0.8191	-0.1619		1.6888	1.2258	0.9132
1.3152	0.9089	0.4092		1.1976	1.3392	0.4089
1.0853	1.0665	0.4407		1.4767	0.974	0.4637
1.141	1.0157	0.045		1.5159	0.5535	0.6132
0.7352	0.9913	0.2669		1.2791	1.0677	0.4712
0.9004	0.7865	0.3046		1.1983	0.7312	0.551
0.8087	0.4273	0.3574		0.9505	0.8507	0.1702
1.0815	0.6442	0.4184		0.9869	0.7486	0.2176
0.7518	0.6278	0.2572		1.7146	0.7336	0.2811
0.7645	0.7873	0.3241		1.4817	0.6383	0.2572
1.2621	0.7649	0.4786		1.4748	1.0632	0.6988
1.4475	1.0158	0.1762		1.5009	1.3116	0.4829
0.8434	0.6746	0.3721		1.3719	1.1896	0.2371
0.9689	0.9162	0.2932		1.9688	0.8306	0.189
0.8543	0.7355	0.4933		1.8476	0.7755	0.4886
1.427	0.8768	0.4273		1.6744	1.0632	0.6458
1.3936	1.1609	0.3818		2.0732	0.9704	0.5876
1.2366	1.2717	0.3262		1.1816	0.6985	0.3363
2.118	0.4497	0.1901		1.3987	0.6467	0.393
0.4857	0.085	0.1337		1.271	0.8478	0.8702
0.5662	0.868	0.1784		1.2308	0.8416	0.7755
0.5178	0.6851	0.2548		1.2725	0.9038	0.7294
0.6344	0.8651	0.3477		2.2794	1.0555	0.6756
0.6451	1.0533	0.3933		1.4547	1.2323	0.6942
0.6836	0.9264	0.5708		1.281	0.4809	0.4292
0.6991	1.1141	0.4683		1.2115	1.4406	0.7206
0.6905	0.517	0.3311		1.5601	1.1332	0.6323
0.7075	0.581	0.4293		1.1957	0.7161	1.123
0.639	0.4128	0.437		1.3228	0.9568	0.7786
0.5984	0.362	0.4646		2.0801	1.6339	1.0819
0.7799	0.2348	0.4827		1.7657	1.3102	1.0048
0.0382	-0.0282	0.6056		1.5939	1.3803	0.9991
0.1377	0.2192			1.8438	1.7881	0.8708
0.152	0.1916			1.582	1.5705	1.187
0.637	0.9189			1.0444	1.5629	0.8097
0.6074	0.1739			0.9898	1.6644	1.2853
0.6084	0.4412			0.6739	1.6361	1.0561
0.7553	0.1981			1.8185	1.4522	1.1438
1.3802	0.6616			2.242	1.8737	1.0324
2.191	0.5275			1.7139	1.715	0.9211
2.3191	0.5506			1.8262	1.5786	0.8683
1.026	0.5242			1.7716	1.7059	1.3003
0.9688	0.7133			1.8234	1.463	1.033
0.7801	0.6826			1.8668	0.8602	0.8473
0.9813	0.9714			1.7573	0.7338	0.7455
0.8585	0.7425			1.7505	0.6599	0.5338
1.1334	0.7475			1.9412	0.47	0.8622
2.0307	0.9332			1.9221	1.3402	0.8172
2.4407	0.6659			2.1064	0.8235	1.1416
0.8401	0.6615			2.0363	0.9659	0.8879
0.9244	0.8192			2.0987	0.8156	0.9729
1.0166	0.9331			1.9798	0.7127	0.9013
1.1227	0.7495			1.9396	0.5838	1.4135
1.0662	1.0122			1.9228	0.5291	1.0612
1.7302	0.8446			1.9833	0.7883	1.0314
1.2296	0.8664			1.8622	0.3454	0.9435
1.6466	0.8699			1.1892	0.1301	1.2568
0.7618	1.0745			1.215	0.1813	0.2555
0.3879	0.7897			0.9337	0.0011669	1.2026
0.6744	0.6933			1.5996	0.0044766	1.3293
0.6787	0.6039			1.6657	0.5814	1.4597
	0.8586			1.335	0.9921
	0.8745			1.5117	1.4449
	0.9619			1.5255	0.8462
	0.9638			1.4059	0.2692
	0.9615			1.2165	1.3766
	0.9394			1.3293	1.1669
	0.8313			1.2386	1.2127
				0.7182	1.3294
				0.7076	1.2755
				0.661	1.4419
				0.5683	1.2875
				1.1919	1.4929
				1.1922	1.1112
				1.1506	0.9694
				1.0499	0.9948
				1.17	0.3841
				1.2082	1.6244
				0.2454	1.2371
				-0.3492	0.8609
				-0.3675	0.9466
				-0.6068	0.8393
				-0.2627	2.053
				0.0473	2.0419
				-0.3584	2.0544
				0.8753	1.598
				0.7569	1.9512
				0.6707	1.8689
				1.7005	1.9834
				1.5912	1.3652
				1.5196	0.787
				1.7475	0.9597
				1.2993	1.0907
				0.838	0.7055
				2.6475	0.9551
				1.5928	0.8857
				1.6835	0.7756
				0.9473	1.5467
				0.9602	1.6526
				0.9752	1.7178
				0.7376	0.7831
				0.6273	1.0298
				0.6093	0.9904
				0.8164	1.3287
				0.9456	1.5501
				1.1649	1.4078
				2.9705	1.4322
				1.6752	1.471
				1.6105	1.0545
				1.782	1.0849
				1.8323	1.0335
				1.5618	1.0734
				1.692	1.619
				1.8801	1.6095
				1.7622	1.4906
				2.0979	1.8809
				1.7819	1.4102
				1.9406	2.0269
				1.8077	1.7792
				1.5319	1.7878
				1.6455	1.9294
				2.0613	1.5254
				2.0029	2.0134
				2.0987	2.0319
				1.9962	1.7724
				1.6878	1.9134
				1.5383	1.7856
				1.5986
				1.8053
				1.6272
				1.611
				1.7151
				1.8741
				1.8458
				0.9779
				0.9939
				1.3462
				1.3508
				1.0417
				1.5595
				2.292
				1.8939
				1.643
				2.156
				2.1247
				2.0796
				2.3157
				2.1161
				2.0127
				1.8768
				1.7705
				2.0506
				2.0849
				1.7464
				1.9169
				2.2538
				2.2044
				2.4048
				2.423
				2.4069
				2.5389
				2.5695
				2.4843
				2.535

[truncated: 22 more sheets: Supp Fig1, Supp Fig2, Supp Fig3, Supp Fig4, Supp Fig4d,e, Supp Fig5, Supp Fig6, Supp Fig7, Supp Fig8, Supp Fig9, Supp Fig10, Supp Fig11, Supp Fig12, Supp Fig13, Supp Fig14, Supp Fig15, Supp Fig15h, Supp Fig16, Supp Fig17, Supp Fig18 …]
